# Supplementary material for: Recommendations for service user involvement in healthcare education: A World Café event
Source: Research Square preprint supplement (doi:10.21203/rs.3.rs-7237769/v1), 2025-08-27
Supplement: Supplementary file 1 [file 75a604866a238d951e5d89f8.docx]

**Appendix Format for World Café event**

The conversation, core to this event, will be facilitated using participatory methodology. The World Café methodology is a simple, effective, and flexible format for hosting large group dialogue. Each element of the method has a specific purpose and corresponds to one or more of the design principles. The event will be audio recorded with the prior consent of all participants. Individuals can select which table they would like to take part in discussions in at any time. Tea/coffee will be available on arrival at registration.

**Introduction: 30 mins**

Broad overview of current service user involvement from staff and some service user perspective from ongoing research at [Blind for Peer Review] will be presented. Group agreement to ground rules to include the confidentiality of the conversations to ensure a sharing of lived experiences.

**World Café Round Table discussions: 90 mins**

1. Welcome and introduction to the process provided by hosts to set the context and etiquette putting participants at ease.

2. Small group rounds of 20 conversations, groups can switch topics after 20 mins or carry on if making progress. These will be 5 – 6 groups per table with a facilitator focusing on one of the following topics of conversation:

Table 1: From your point of view, do you think there are benefits for students engaging with service users/patients directly?

Table 2: What might some of the challenges or risks be for students or service users/patients when meeting a student on placement?

Table 3: How could current processes for including service users in teaching in the university be improved?

Table 4: How can service user/patients contribute to teaching on placement/fieldwork/in the community?

Participants will discuss the topic briefly and brainstorm answers to the questions together. Each facilitator will manage the audio-recordings and take notes to illustrate the ideas that emerged from the discussions.

**Walk/roll through ideas 30 mins**

Knowledge from all the discussions will be shared with the full participant group to provide a collective summary and consensus of the information collected as representative of the conversations held.

Lunch will be provided and voucher of 15euro as recognition of time and expertise for each service user/patient/family member who is attending.

**Follow up within 1 month of event**

Following the World Cafe event, each facilitator will listen back over the recorded sessions to record written summaries gathered of each topic of conversation. These written summaries will be sent to all participants for further verification. The video recordings will be transcribed and then deleted.
